# Supplementary material for: Adenylate cyclase 9 expression level is associated with hormone receptor-positive breast cancer and predicts patient prognosis
Source: PubMed Central journal article supplement — Nagoya J Med Sci. 2024 Nov;86(4):665–82. doi: 10.18999/nagjms.86.4.665 (PMC11704764; doi:10.18999/nagjms.86.4.665), 2024-11
Supplement: 2186-3326-86-0665-s001.pdf [file 2186-3326-86-0665-s001.pdf]

SUPPLEMENTARY INFORMATION

**Supplementary Table** Correlations between mRNA expression levels of *ADCY9* and 84 cancer-related genes

| Genes         | Official full names                                    | Correlation coefficients | P-values |
|---------------|--------------------------------------------------------|--------------------------|----------|
| <i>ABL1</i>   | ABL proto-oncogene 1, non-receptor tyrosine kinase     | 0.3297                   | 0.2713   |
| <i>AKT1</i>   | AKT serine/threonine kinase 1                          | 0.4615                   | 0.1124   |
| <i>APC</i>    | APC regulator of WNT signaling pathway                 | 0.4066                   | 0.168    |
| <i>ATM</i>    | ATM serine/threonine kinase                            | 0.2033                   | 0.5053   |
| <i>BAX</i>    | BCL2 associated X, apoptosis regulator                 | 0.6593                   | 0.0142   |
| <i>BCL2</i>   | BCL2 apoptosis regulator                               | 0.5495                   | 0.0518   |
| <i>BCL2L1</i> | BCL2 like 1                                            | -0.2363                  | 0.4371   |
| <i>BCR</i>    | BCR activator of RhoGEF and GTPase                     | 0.2692                   | 0.3737   |
| <i>BRCA1</i>  | BRCA1 DNA repair associated                            | 0.4451                   | 0.1275   |
| <i>BRCA2</i>  | BRCA2 DNA repair associated                            | 0.6538                   | 0.0153   |
| <i>CASP8</i>  | caspase 8                                              | 0.0934                   | 0.7615   |
| <i>CCND1</i>  | cyclin D1                                              | 0.4011                   | 0.1744   |
| <i>CDH1</i>   | cadherin 1                                             | 0.0989                   | 0.7479   |
| <i>CDK4</i>   | cyclin dependent kinase 4                              | 0.5495                   | 0.0518   |
| <i>CDKN1A</i> | cyclin dependent kinase inhibitor 1A                   | 0.6868                   | 0.0095   |
| <i>CDKN2A</i> | cyclin dependent kinase inhibitor 2A                   | -0.1758                  | 0.5656   |
| <i>CDKN2B</i> | cyclin dependent kinase inhibitor 2B                   | 0.3631                   | 0.2226   |
| <i>CDKN3</i>  | cyclin dependent kinase inhibitor 3                    | 0.5165                   | 0.0707   |
| <i>CTNNB1</i> | catenin beta 1                                         | 0.1703                   | 0.578    |
| <i>E2F1</i>   | E2F transcription factor 1                             | 0.1099                   | 0.7208   |
| <i>EGF</i>    | epidermal growth factor                                | -0.2802                  | 0.3538   |
| <i>ELK1</i>   | ETS transcription factor ELK1                          | 0.0659                   | 0.8305   |
| <i>ERBB2</i>  | erb-b2 receptor tyrosine kinase 2                      | -0.2418                  | 0.4262   |
| <i>ESR1</i>   | estrogen receptor 1                                    | 0.2308                   | 0.4481   |
| <i>ETS1</i>   | ETS proto-oncogene 1, transcription factor             | -0.0055                  | 0.9858   |
| <i>FHIT</i>   | fragile histidine triad diadenosine triphosphatase     | -0.1484                  | 0.6286   |
| <i>FOS</i>    | Fos proto-oncogene, AP-1 transcription factor subunit  | 0.0769                   | 0.8028   |
| <i>FOXD3</i>  | forkhead box D3                                        | -0.0934                  | 0.7615   |
| <i>HGF</i>    | hepatocyte growth factor                               | -0.4088                  | 0.1654   |
| <i>HIC1</i>   | HIC ZBTB transcriptional repressor 1                   | 0.0604                   | 0.8445   |
| <i>HRAS</i>   | HRas proto-oncogene, GTPase                            | 0.3846                   | 0.1944   |
| <i>IGF2R</i>  | insulin like growth factor 2 receptor                  | 0.1923                   | 0.5291   |
| <i>JAK2</i>   | Janus kinase 2                                         | 0.4011                   | 0.1744   |
| <i>JUN</i>    | Jun proto-oncogene, AP-1 transcription factor subunit  | 0.2802                   | 0.3538   |
| <i>JUNB</i>   | JunB proto-oncogene, AP-1 transcription factor subunit | -0.0055                  | 0.9858   |
| <i>JUND</i>   | JunD proto-oncogene, AP-1 transcription factor subunit | -0.0604                  | 0.8445   |
| <i>KIT</i>    | KIT proto-oncogene, receptor tyrosine kinase           | 0.1044                   | 0.7343   |
| <i>KITLG</i>  | KIT ligand                                             | -0.0055                  | 0.9858   |
| <i>KRAS</i>   | KRAS proto-oncogene, GTPase                            | 0.2308                   | 0.4481   |
| <i>MCL1</i>   | MCL1 apoptosis regulator, BCL2 family member           | 0.0934                   | 0.7615   |
| <i>MDM2</i>   | MDM2 proto-oncogene                                    | 0.3681                   | 0.2159   |
| <i>MEN1</i>   | menin 1                                                | 0.1868                   | 0.5411   |
| <i>MET</i>    | MET proto-oncogene, receptor tyrosine kinase           | 0.1703                   | 0.578    |
| <i>MGMT</i>   | O-6-methylguanine-DNA methyltransferase                | 0.1099                   | 0.7208   |

|                 |                                                                          |         |        |
|-----------------|--------------------------------------------------------------------------|---------|--------|
| <i>MLH1</i>     | mutL homolog 1                                                           | 0.5659  | 0.0438 |
| <i>MOS</i>      | MOS proto-oncogene, serine/threonine kinase                              | -0.0989 | 0.7479 |
| <i>MYB</i>      | MYB proto-oncogene, transcription factor                                 | 0.1648  | 0.5905 |
| <i>MYC</i>      | MYC proto-oncogene, bHLH transcription factor                            | 0.3626  | 0.2233 |
| <i>MYCN</i>     | MYCN proto-oncogene, bHLH transcription factor                           | -0.2473 | 0.4154 |
| <i>NF1</i>      | neurofibromin 1                                                          | 0.2253  | 0.4593 |
| <i>NF2</i>      | neurofibromin 2                                                          | 0.2253  | 0.4593 |
| <i>NFKB1</i>    | nuclear factor kappa B subunit 1                                         | 0.4341  | 0.1383 |
| <i>NFKBIA</i>   | NFKB inhibitor alpha                                                     | 0.6484  | 0.0165 |
| <i>NRAS</i>     | NRAS proto-oncogene, GTPase                                              | 0.6538  | 0.0153 |
| <i>PIK3C2A</i>  | phosphatidylinositol-4-phosphate 3-kinase catalytic subunit type 2 alpha | -0.0055 | 0.9858 |
| <i>PIK3CA</i>   | phosphatidylinositol-4,5-bisphosphate 3-kinase catalytic subunit alpha   | 0.4615  | 0.1124 |
| <i>PML</i>      | PML nuclear body scaffold                                                | 0.3077  | 0.3064 |
| <i>PRKCA</i>    | protein kinase C alpha                                                   | 0.5385  | 0.0576 |
| <i>RAF1</i>     | Raf-1 proto-oncogene, serine/threonine kinase                            | 0.5989  | 0.0306 |
| <i>RARA</i>     | retinoic acid receptor alpha                                             | 0.2857  | 0.344  |
| <i>RASSF1</i>   | Ras association domain family member 1                                   | -0.1319 | 0.6676 |
| <i>RB1</i>      | RB transcriptional corepressor 1                                         | 0.4066  | 0.168  |
| <i>REL</i>      | REL proto-oncogene, NF-kB subunit                                        | 0.2198  | 0.4706 |
| <i>RET</i>      | ret proto-oncogene                                                       | 0.0165  | 0.9574 |
| <i>ROS1</i>     | ROS proto-oncogene 1, receptor tyrosine kinase                           | -0.2637 | 0.3839 |
| <i>RUNX1</i>    | RUNX family transcription factor 1                                       | 0.3297  | 0.2713 |
| <i>RUNX3</i>    | RUNX family transcription factor 3                                       | -0.3242 | 0.2799 |
| <i>S100A4</i>   | S100 calcium binding protein A4                                          | 0.1648  | 0.5905 |
| <i>SERPINB5</i> | serpin family B member 5                                                 | -0.3956 | 0.1809 |
| <i>SH3PXD2A</i> | SH3 and PX domains 2A                                                    | -0.0495 | 0.8725 |
| <i>SMAD4</i>    | SMAD family member 4                                                     | 0.6593  | 0.0142 |
| <i>SRC</i>      | SRC proto-oncogene, non-receptor tyrosine kinase                         | 0.011   | 0.9716 |
| <i>STAT3</i>    | signal transducer and activator of transcription 3                       | 0.1593  | 0.6031 |
| <i>STK11</i>    | serine/threonine kinase 11                                               | 0.3681  | 0.2159 |
| <i>TGFB1</i>    | transforming growth factor beta 1                                        | 0.7088  | 0.0067 |
| <i>TNF</i>      | tumor necrosis factor                                                    | 0.033   | 0.9149 |
| <i>TP53</i>     | tumor protein p53                                                        | 0.4066  | 0.168  |
| <i>TP73</i>     | tumor protein p73                                                        | 0.2747  | 0.3637 |
| <i>TSC1</i>     | TSC complex subunit 1                                                    | 0.4066  | 0.168  |
| <i>VHL</i>      | von Hippel-Lindau tumor suppressor                                       | 0.3846  | 0.1944 |
| <i>WT1</i>      | WT1 transcription factor                                                 | -0.3681 | 0.2159 |
| <i>WWOX</i>     | WW domain containing oxidoreductase                                      | 0.3956  | 0.1809 |
| <i>XRCC1</i>    | X-ray repair cross complementing 1                                       | 0.3736  | 0.2086 |
| <i>ZHX2</i>     | zinc fingers and homeoboxes 2                                            | 0.1538  | 0.6158 |

*ADCY9*: adenylate cyclase 9

mRNA: messenger RNA
